# Supplementary material for: Preparation of large-size single-crystal metal–organic frameworks via the Marangoni effect
Source: Royal Society of Chemistry journal article supplement (doi:10.1039/d3ce00166k), 2023-01-01
Supplement: d3ce00166k1.pdf [file d3ce00166k1.pdf]

*Supporting information*

**Preparation of large-size single-crystal metal-organic frameworks via**

**Marangoni effect**

*Fuqiang Fan\*, Zihui Zhang, Jin Guo, Liying Zhang, Xuemin Zhang, Tieqiang Wang and Yu Fu\**  
*Department of Chemistry, College of Sciences, Northeastern University, Shenyang, 110819, P. R. China.*

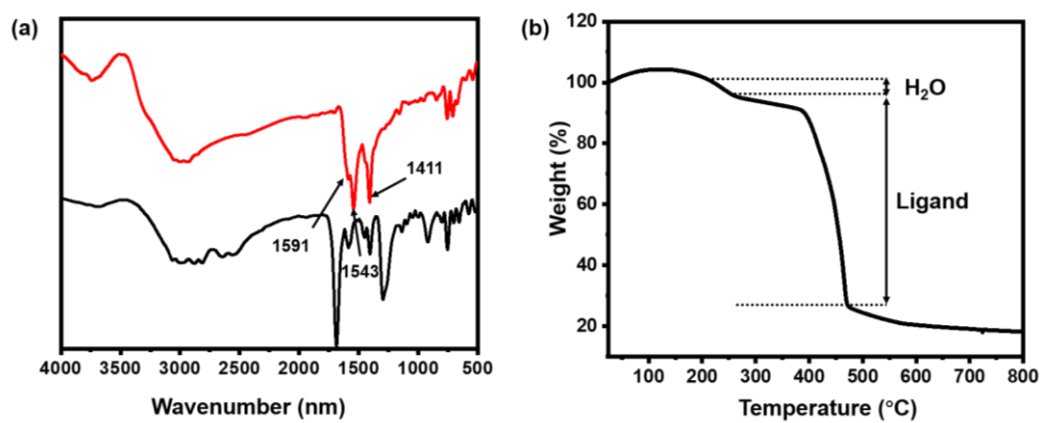

**Figure S1.** The characterization of Zn-MOF. (a) FT-IR spectra. Blank line: ligand; red line: Zn-MOF. (b) Thermogravimetric analysis.

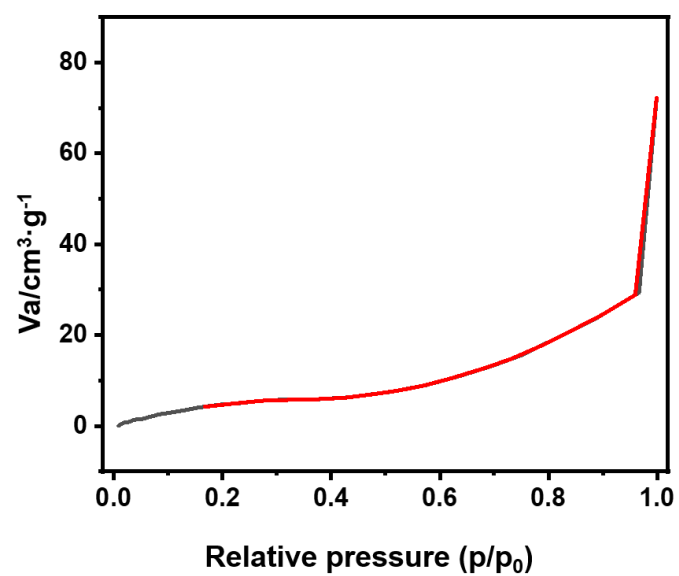

**Figure S2.** N<sub>2</sub> adsorption-desorption isotherm of Zn-MOF.

The surface area of the Zn-MOF is 16.446 m<sup>2</sup>/g, and the N<sub>2</sub> adsorption isotherms show a type-II.

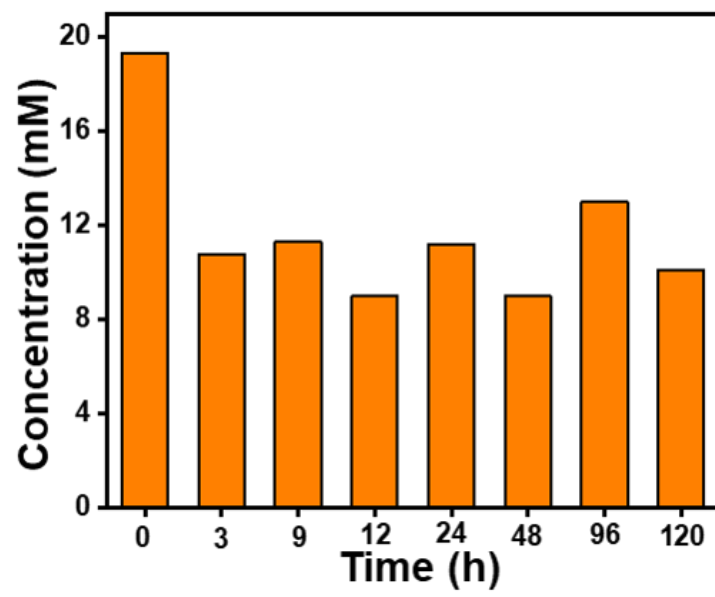

**Figure S3.** Concentration changing of Zn<sup>2+</sup> ion in solution with reaction time calculated by ICP.

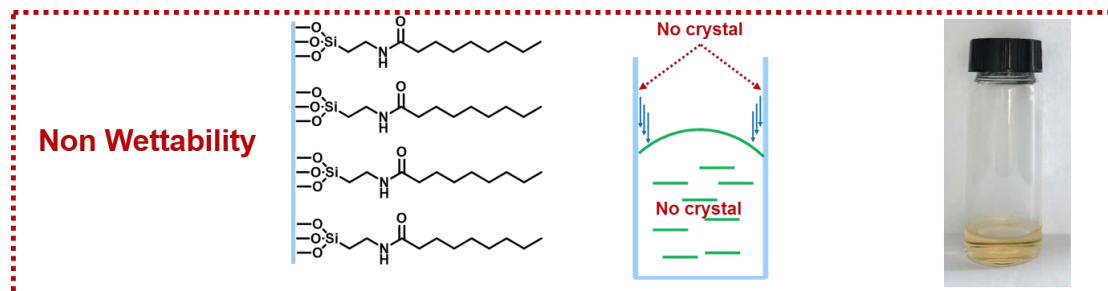

**Figure S4.** Modified the Pyrex vial with alkyl chain and used it to prepare the Zn-MOF.

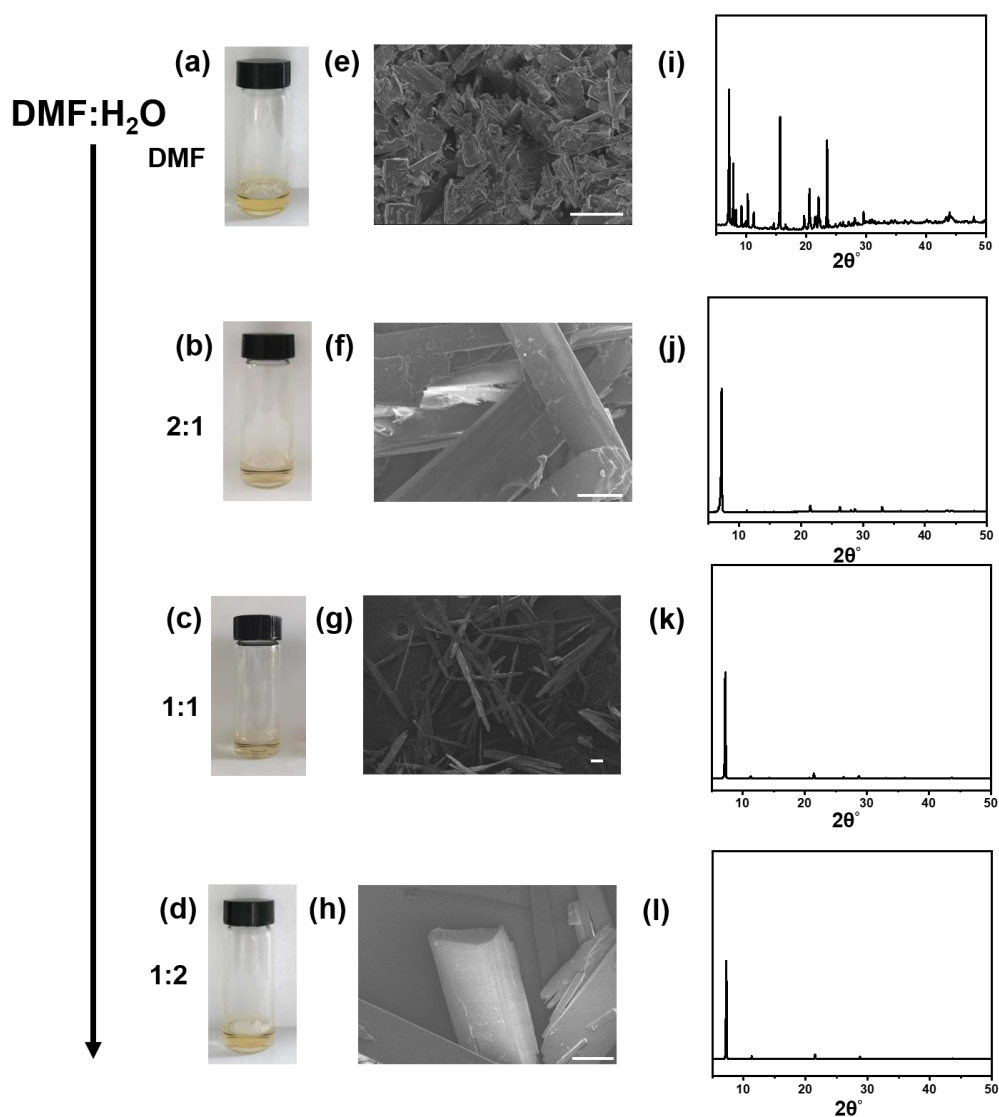

**Figure S5.** Synthesize Zn-MOF using different content of water in solution. (a-d) Photographs for Zn-MOF crystal generated on the vessel wall of the Pyrex vessel. (e-h) SEM images. The scale bar is 50  $\mu\text{m}$ . (i-l) PXRD patterns for the Zn-MOF crystal.

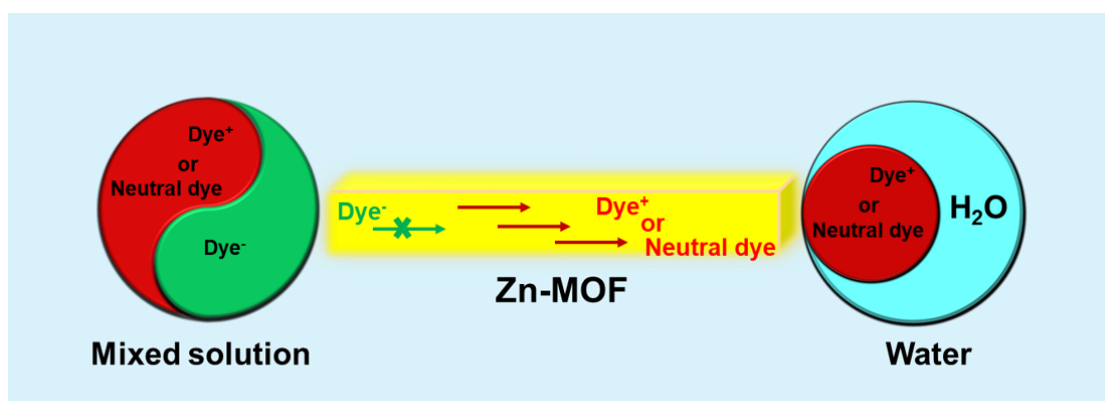

**Figure S6.** Schematic illustration for the mixed dye separation.

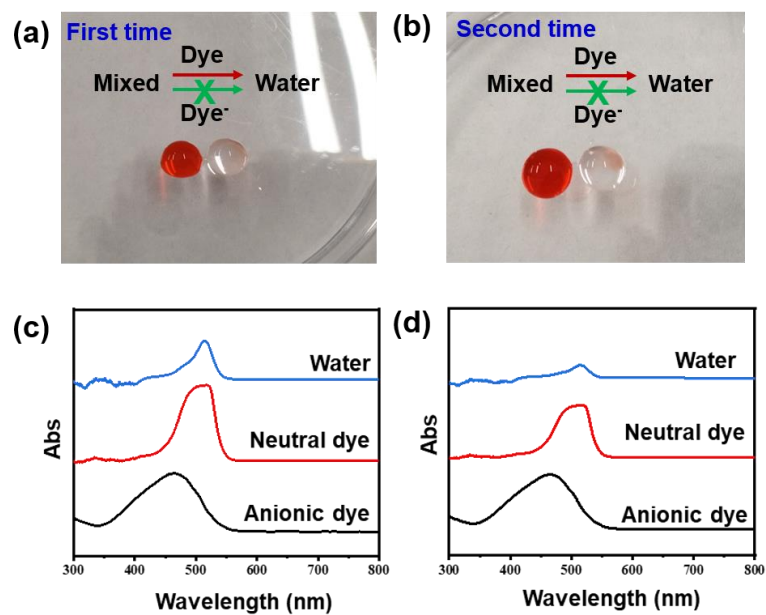

**Figure S7.** Reusability of Zn-MOF for the selective separation of dyes. Photographs of the selective separation of mixed dye solution: dye solution (left), Zn-MOF crystal (middle), and water (right): (a, b) mixed neutral and anionic dyes. Anionic dye: methyl orange; neutral dye: eosin Y. (c, d) UV absorption spectrum of different solution.



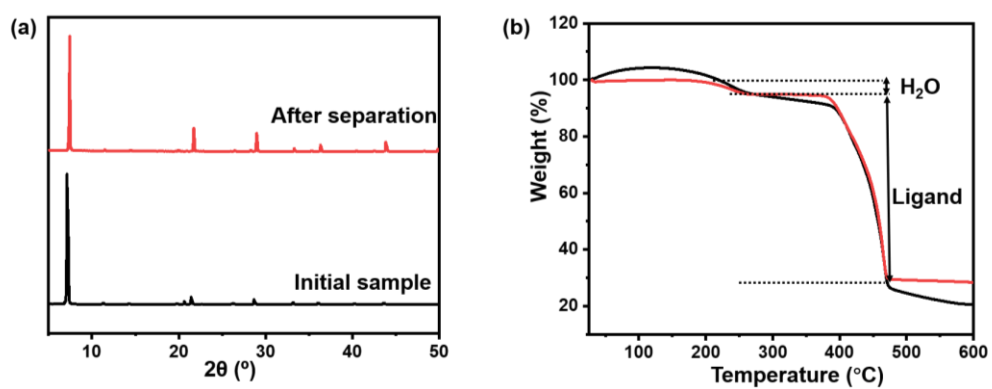

**Figure S8.** The characterization of the Zn-MOF before and after the separation of mixed dyes. (a) PXRD. (b) TGA. Black line: initial sample; red line: crystal after the dye separation.

**Table 1.** Crystal data and structure refinement for Zn-MOF.

|                                   |                                                                                   |
|-----------------------------------|-----------------------------------------------------------------------------------|
| Identification code               | 2107028977                                                                        |
| Empirical formula                 | C <sub>14</sub> H <sub>10</sub> O <sub>5</sub> Zn                                 |
| Formula weight                    | 323.59                                                                            |
| Temperature                       | 296.15 K                                                                          |
| Wavelength                        | 0.71073 Å                                                                         |
| Crystal system                    | Monoclinic                                                                        |
| Space group                       | P 1 21/c 1                                                                        |
| Unit cell dimensions              | a = 12.846(5) Å = 90°.<br>b = 5.943(2) Å = 104.065(7)°.<br>c = 17.311(7) Å = 90°. |
| Volume                            | 1281.9(8) Å <sup>3</sup>                                                          |
| Z                                 | 4                                                                                 |
| Density (calculated)              | 1.677 Mg/m <sup>3</sup>                                                           |
| Absorption coefficient            | 1.931 mm <sup>-1</sup>                                                            |
| F(000)                            | 656                                                                               |
| Crystal size                      | 0.12 x 0.02 x 0.01 mm <sup>3</sup>                                                |
| Theta range for data collection   | 1.634 to 26.577°.                                                                 |
| Index ranges                      | -16<=h<=14, -7<=k<=7, -21<=l<=21                                                  |
| Reflections collected             | 8883                                                                              |
| Independent reflections           | 2637 [R(int) = 0.0535]                                                            |
| Completeness to theta = 25.242°   | 100.0 %                                                                           |
| Absorption correction             | Semi-empirical from equivalents                                                   |
| Max. and min. transmission        | 0.7456 and 0.4786                                                                 |
| Refinement method                 | Full-matrix least-squares on F <sup>2</sup>                                       |
| Data / restraints / parameters    | 2637 / 0 / 186                                                                    |
| Goodness-of-fit on F <sup>2</sup> | 0.984                                                                             |
| Final R indices [I>2sigma(I)]     | R1 = 0.0355, wR2 = 0.0818                                                         |
| R indices (all data)              | R1 = 0.0538, wR2 = 0.0890                                                         |
| Extinction coefficient            | n/a                                                                               |
| Largest diff. peak and hole       | 0.469 and -0.601 e.Å <sup>-3</sup>                                                |

**Table 2.** Atomic coordinates ( $\times 10^4$ ) and equivalent isotropic displacement parameters ( $\text{\AA}^2 \times 10^3$ ) for Zn-MOF.  $U(\text{eq})$  is defined as one third of the trace of the orthogonalized  $U^{\text{ij}}$  tensor.

|       | x       | y        | z       | $U(\text{eq})$ |
|-------|---------|----------|---------|----------------|
| Zn(1) | 4409(1) | 253(1)   | 3896(1) | 30(1)          |
| O(1)  | 5793(2) | 1655(4)  | 4255(1) | 45(1)          |
| O(2)  | 6056(2) | 2264(4)  | 5555(1) | 40(1)          |
| O(3)  | 6775(2) | 7648(4)  | 6315(1) | 39(1)          |
| O(4)  | 6043(2) | 5641(4)  | 7123(1) | 42(1)          |
| O(5)  | 4563(2) | -1367(4) | 2941(1) | 39(1)          |
| C(1)  | 6246(2) | 2644(5)  | 4890(2) | 30(1)          |
| C(2)  | 7044(2) | 4415(5)  | 4825(2) | 30(1)          |
| C(3)  | 6900(3) | 5512(6)  | 4093(2) | 44(1)          |
| C(4)  | 7574(3) | 7225(6)  | 3992(2) | 53(1)          |
| C(5)  | 8421(3) | 7831(6)  | 4612(2) | 52(1)          |
| C(6)  | 8586(2) | 6727(6)  | 5327(2) | 43(1)          |
| C(7)  | 7899(2) | 5051(5)  | 5460(2) | 31(1)          |
| C(8)  | 8168(2) | 3882(5)  | 6244(2) | 29(1)          |
| C(9)  | 8975(2) | 2262(5)  | 6374(2) | 42(1)          |
| C(10) | 9257(3) | 1086(6)  | 7075(2) | 51(1)          |
| C(11) | 8729(3) | 1465(6)  | 7669(2) | 45(1)          |
| C(12) | 7932(2) | 3041(5)  | 7554(2) | 38(1)          |
| C(13) | 7645(2) | 4295(5)  | 6853(2) | 29(1)          |
| C(14) | 6757(2) | 5981(5)  | 6756(2) | 31(1)          |

**Table 3.** Bond lengths [Å] and angles [°] for Zn-MOF.

---

|                   |            |
|-------------------|------------|
| Zn(1)-O(1)        | 1.924(2)   |
| Zn(1)-O(2)#1      | 1.943(2)   |
| Zn(1)-O(3)#2      | 1.933(2)   |
| Zn(1)-O(5)        | 1.964(2)   |
| O(1)-C(1)         | 1.257(3)   |
| O(2)-C(1)         | 1.253(3)   |
| O(3)-C(14)        | 1.256(3)   |
| O(4)-C(14)        | 1.252(3)   |
| O(5)-H(5A)        | 0.8526     |
| O(5)-H(5B)        | 0.79(4)    |
| C(1)-C(2)         | 1.493(4)   |
| C(2)-C(3)         | 1.397(4)   |
| C(2)-C(7)         | 1.404(4)   |
| C(3)-H(3)         | 0.9300     |
| C(3)-C(4)         | 1.375(5)   |
| C(4)-H(4)         | 0.9300     |
| C(4)-C(5)         | 1.376(5)   |
| C(5)-H(5)         | 0.9300     |
| C(5)-C(6)         | 1.372(5)   |
| C(6)-H(6)         | 0.9300     |
| C(6)-C(7)         | 1.386(4)   |
| C(7)-C(8)         | 1.489(4)   |
| C(8)-C(9)         | 1.392(4)   |
| C(8)-C(13)        | 1.403(4)   |
| C(9)-H(9)         | 0.9300     |
| C(9)-C(10)        | 1.370(5)   |
| C(10)-H(10)       | 0.9300     |
| C(10)-C(11)       | 1.383(5)   |
| C(11)-H(11)       | 0.9300     |
| C(11)-C(12)       | 1.365(4)   |
| C(12)-H(12)       | 0.9300     |
| C(12)-C(13)       | 1.394(4)   |
| C(13)-C(14)       | 1.497(4)   |
| O(1)-Zn(1)-O(2)#1 | 123.00(9)  |
| O(1)-Zn(1)-O(3)#2 | 113.85(10) |
| O(1)-Zn(1)-O(5)   | 102.17(9)  |

|                     |            |
|---------------------|------------|
| O(2)#1-Zn(1)-O(5)   | 98.09(10)  |
| O(3)#2-Zn(1)-O(2)#1 | 105.49(9)  |
| O(3)#2-Zn(1)-O(5)   | 113.18(10) |
| C(1)-O(1)-Zn(1)     | 132.84(19) |
| C(1)-O(2)-Zn(1)#1   | 137.7(2)   |
| C(14)-O(3)-Zn(1)#2  | 119.56(18) |
| Zn(1)-O(5)-H(5A)    | 109.5      |
| Zn(1)-O(5)-H(5B)    | 117(3)     |
| H(5A)-O(5)-H(5B)    | 122.5      |
| O(1)-C(1)-C(2)      | 116.3(3)   |
| O(2)-C(1)-O(1)      | 124.5(3)   |
| O(2)-C(1)-C(2)      | 119.1(3)   |
| C(3)-C(2)-C(1)      | 117.1(3)   |
| C(3)-C(2)-C(7)      | 119.3(3)   |
| C(7)-C(2)-C(1)      | 123.5(3)   |
| C(2)-C(3)-H(3)      | 119.6      |
| C(4)-C(3)-C(2)      | 120.8(3)   |
| C(4)-C(3)-H(3)      | 119.6      |
| C(3)-C(4)-H(4)      | 120.1      |
| C(3)-C(4)-C(5)      | 119.8(3)   |
| C(5)-C(4)-H(4)      | 120.1      |
| C(4)-C(5)-H(5)      | 120.1      |
| C(6)-C(5)-C(4)      | 119.8(3)   |
| C(6)-C(5)-H(5)      | 120.1      |
| C(5)-C(6)-H(6)      | 119.0      |
| C(5)-C(6)-C(7)      | 121.9(3)   |
| C(7)-C(6)-H(6)      | 119.0      |
| C(2)-C(7)-C(8)      | 123.5(2)   |
| C(6)-C(7)-C(2)      | 118.2(3)   |
| C(6)-C(7)-C(8)      | 118.1(3)   |
| C(9)-C(8)-C(7)      | 118.0(3)   |
| C(9)-C(8)-C(13)     | 118.2(3)   |
| C(13)-C(8)-C(7)     | 123.8(3)   |
| C(8)-C(9)-H(9)      | 119.2      |
| C(10)-C(9)-C(8)     | 121.5(3)   |
| C(10)-C(9)-H(9)     | 119.2      |
| C(9)-C(10)-H(10)    | 119.9      |
| C(9)-C(10)-C(11)    | 120.2(3)   |

|                   |          |
|-------------------|----------|
| C(11)-C(10)-H(10) | 119.9    |
| C(10)-C(11)-H(11) | 120.4    |
| C(12)-C(11)-C(10) | 119.3(3) |
| C(12)-C(11)-H(11) | 120.4    |
| C(11)-C(12)-H(12) | 119.2    |
| C(11)-C(12)-C(13) | 121.6(3) |
| C(13)-C(12)-H(12) | 119.2    |
| C(8)-C(13)-C(14)  | 121.6(3) |
| C(12)-C(13)-C(8)  | 119.1(3) |
| C(12)-C(13)-C(14) | 119.2(3) |
| O(3)-C(14)-C(13)  | 118.0(2) |
| O(4)-C(14)-O(3)   | 124.1(3) |
| O(4)-C(14)-C(13)  | 117.9(3) |

---

Symmetry transformations used to generate equivalent atoms:

#1  $-x+1, -y, -z+1$       #2  $-x+1, -y+1, -z+1$

**Table 4.** Anisotropic displacement parameters ( $\text{\AA}^2 \times 10^3$ ) for Zn-MOF. The anisotropic displacement factor exponent takes the form:  $-2^2 [ h^2 a^* U^{11} + \dots + 2 h k a^* b^* U^{12} ]$

|       | U <sup>11</sup> | U <sup>22</sup> | U <sup>33</sup> | U <sup>23</sup> | U <sup>13</sup> | U <sup>12</sup> |
|-------|-----------------|-----------------|-----------------|-----------------|-----------------|-----------------|
| Zn(1) | 32(1)           | 27(1)           | 30(1)           | -1(1)           | 7(1)            | -4(1)           |
| O(1)  | 41(1)           | 54(2)           | 38(1)           | -9(1)           | 6(1)            | -18(1)          |
| O(2)  | 48(1)           | 38(1)           | 35(1)           | 0(1)            | 9(1)            | -14(1)          |
| O(3)  | 39(1)           | 31(1)           | 49(1)           | 5(1)            | 16(1)           | 3(1)            |
| O(4)  | 45(1)           | 37(1)           | 52(1)           | -4(1)           | 27(1)           | 0(1)            |
| O(5)  | 41(1)           | 34(1)           | 44(1)           | -8(1)           | 19(1)           | -11(1)          |
| C(1)  | 27(1)           | 25(2)           | 35(2)           | 1(1)            | 3(1)            | 2(1)            |
| C(2)  | 32(2)           | 26(2)           | 32(2)           | 1(1)            | 8(1)            | -1(1)           |
| C(3)  | 50(2)           | 44(2)           | 34(2)           | 6(2)            | 4(2)            | -4(2)           |
| C(4)  | 72(2)           | 48(2)           | 41(2)           | 15(2)           | 18(2)           | -9(2)           |
| C(5)  | 58(2)           | 45(2)           | 56(2)           | 4(2)            | 22(2)           | -19(2)          |
| C(6)  | 41(2)           | 44(2)           | 44(2)           | -3(2)           | 9(1)            | -12(2)          |
| C(7)  | 29(1)           | 32(2)           | 33(1)           | -4(1)           | 10(1)           | -1(1)           |
| C(8)  | 24(1)           | 28(2)           | 35(2)           | -4(1)           | 3(1)            | -3(1)           |
| C(9)  | 33(2)           | 43(2)           | 47(2)           | -4(2)           | 6(1)            | 9(1)            |
| C(10) | 44(2)           | 40(2)           | 63(2)           | 6(2)            | 2(2)            | 12(2)           |
| C(11) | 46(2)           | 36(2)           | 46(2)           | 10(2)           | -4(2)           | -1(2)           |
| C(12) | 41(2)           | 37(2)           | 33(2)           | -1(1)           | 3(1)            | -8(1)           |
| C(13) | 27(1)           | 26(2)           | 33(2)           | -3(1)           | 3(1)            | -3(1)           |
| C(14) | 31(2)           | 29(2)           | 32(2)           | -9(1)           | 6(1)            | -6(1)           |

**Table 5.** Hydrogen coordinates ( $\times 10^4$ ) and isotropic displacement parameters ( $\text{\AA}^2 \times 10^{-3}$ ) for Zn-MOF.

|       | x        | y         | z        | U(eq)  |
|-------|----------|-----------|----------|--------|
| H(5A) | 5154     | -997      | 2834     | 58     |
| H(3)  | 6342     | 5078      | 3668     | 53     |
| H(4)  | 7458     | 7974      | 3507     | 64     |
| H(5)  | 8880     | 8986      | 4545     | 62     |
| H(6)  | 9176     | 7113      | 5735     | 52     |
| H(9)  | 9330     | 1973      | 5976     | 50     |
| H(10) | 9807     | 29        | 7150     | 61     |
| H(11) | 8913     | 656       | 8143     | 54     |
| H(12) | 7572     | 3284      | 7952     | 46     |
| H(5B) | 4340(30) | -2610(70) | 2890(20) | 50(11) |



**Table S6.** Elemental analysis of Zn-MOF.

| Sample | C     |       | O    |      | H    |      |
|--------|-------|-------|------|------|------|------|
|        | The.  | Exp.  | The. | Exp. | The. | Exp. |
| Zn-MOF | 51.8% | 51.7% | 24.6 | 24.2 | 3.0% | 3.0% |

**Element analysis:**

The chemical formula of Zn-MOF crystal is  $\{Zn(C_{14}H_8O_4) \cdot H_2O\}$ .

The theoretical value of element was calculated based on the following equation.

$$\text{Theoretical value}_{(\text{element})} = \frac{M(\text{element}) \times N_{\text{number}}}{M_{\text{total}}}$$

$$\text{Theoretical value}_{(C)} = \frac{M(\text{element}) \times N_{\text{number}}}{M_{\text{total}}} = \frac{12 \times 14}{324} = 51.8\%$$

$$\text{Theoretical value}_{(H)} = \frac{M(\text{element}) \times N_{\text{number}}}{M_{\text{total}}} = \frac{1 \times 10}{324} = 3.0\%$$

$$\text{Theoretical value}_{(O)} = \frac{M(\text{element}) \times N_{\text{number}}}{M_{\text{total}}} = \frac{16 \times 5}{324} = 24.6\%$$
